# Supplementary material for: IL‐36γ and IL‐36Ra Reciprocally Regulate Colon Inflammation and Tumorigenesis by Modulating the Cell–Matrix Adhesion Network and Wnt Signaling
Source: PubMed Central journal article supplement (PMC8981487; doi:10.1002/advs.202103035), 2022-02-04

## Supporting Information

for *Adv. Sci.*, DOI 10.1002/adv.202103035

IL-36 $\gamma$  and IL-36Ra Reciprocally Regulate Colon Inflammation and Tumorigenesis by Modulating the Cell–Matrix Adhesion Network and Wnt Signaling

*Wei Yang, Hong-Peng Dong, Peng Wang, Zhi-Gao Xu, Jiahuan Xian, Jiachen Chen, Hai Wu, Yang Lou, Dandan Lin\* and Bo Zhong\**

4d

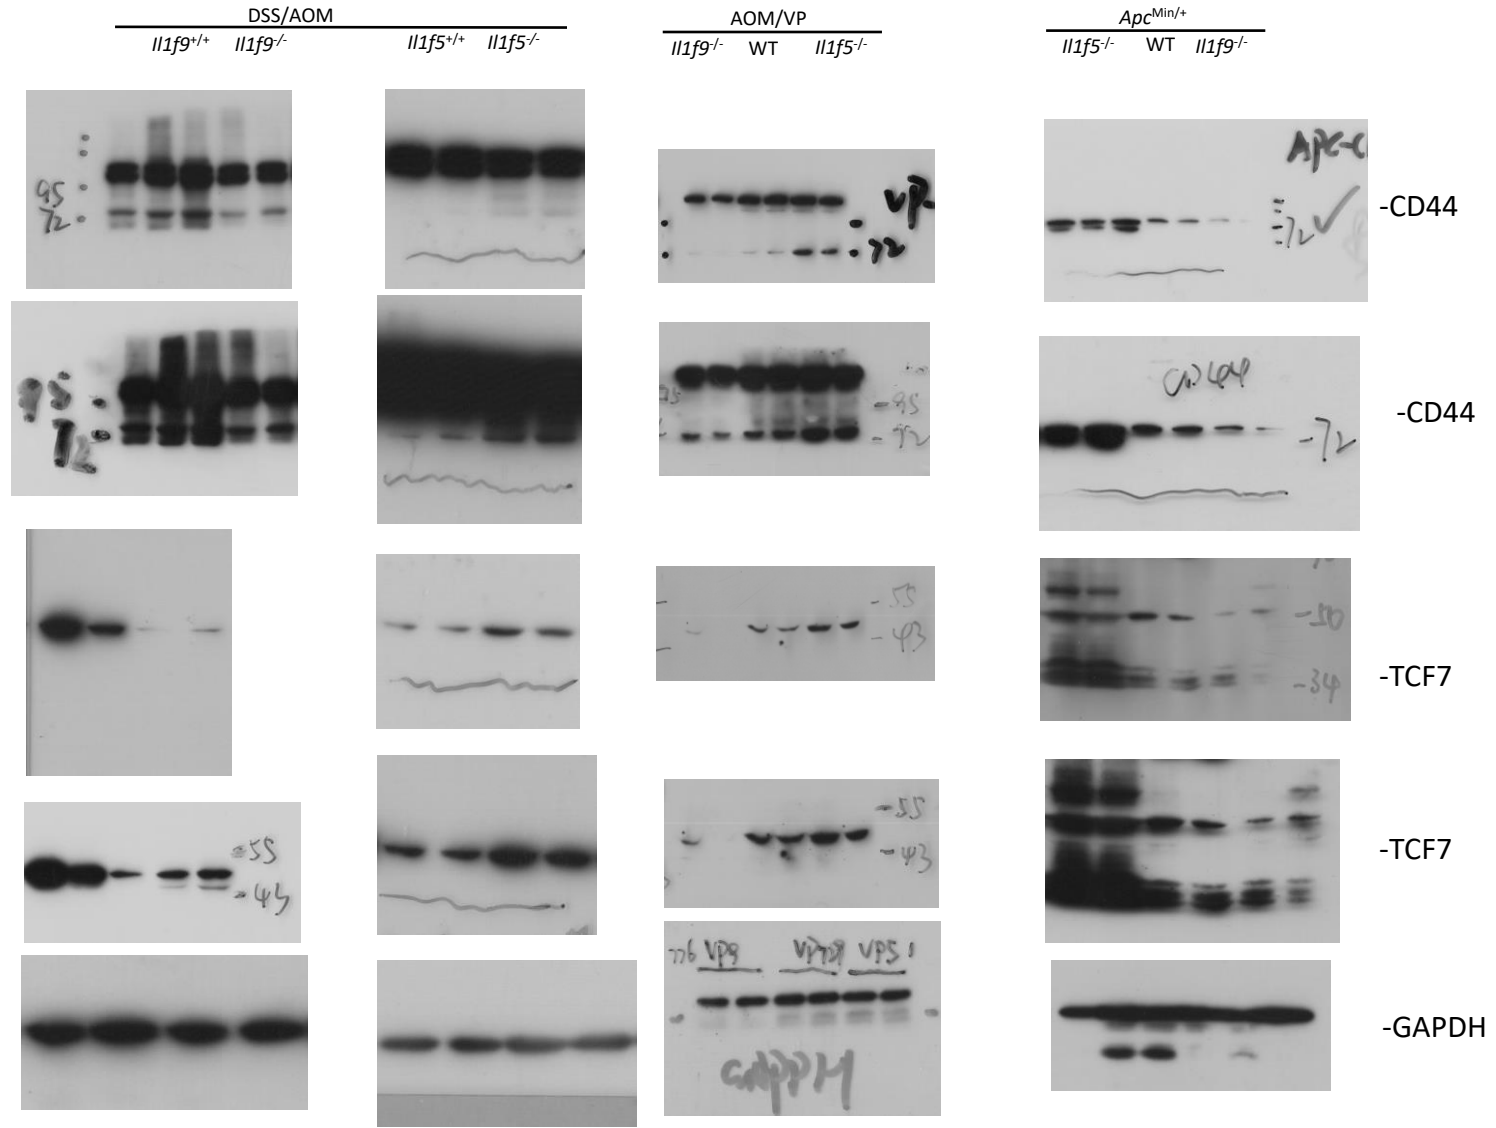

# 5h

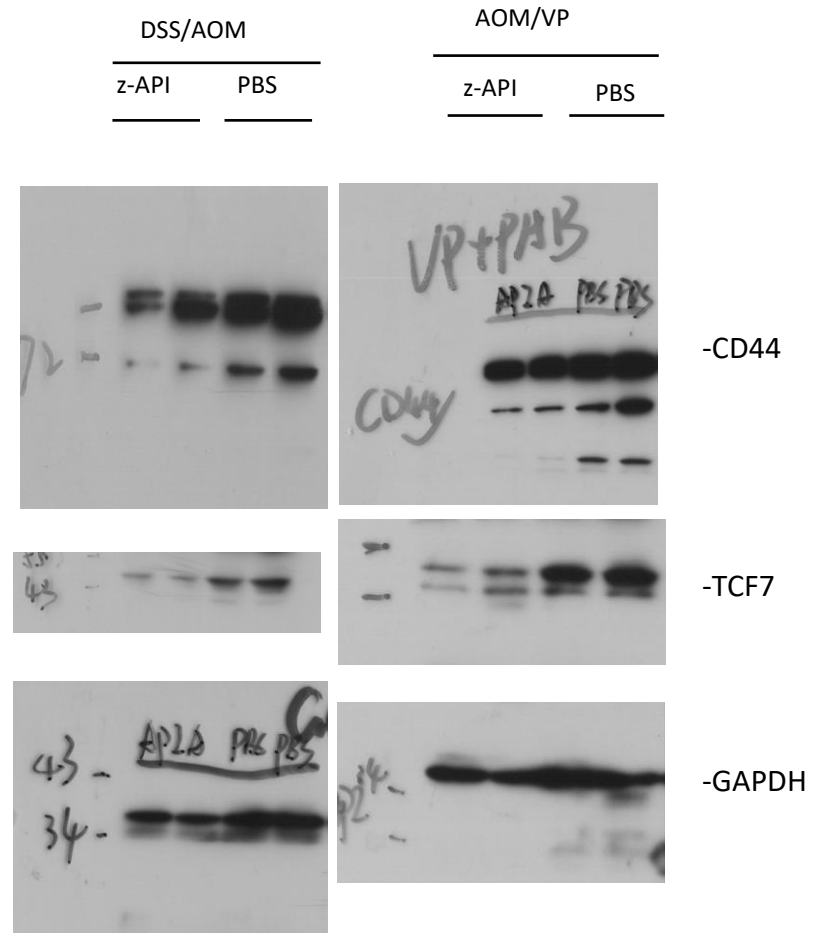

6g

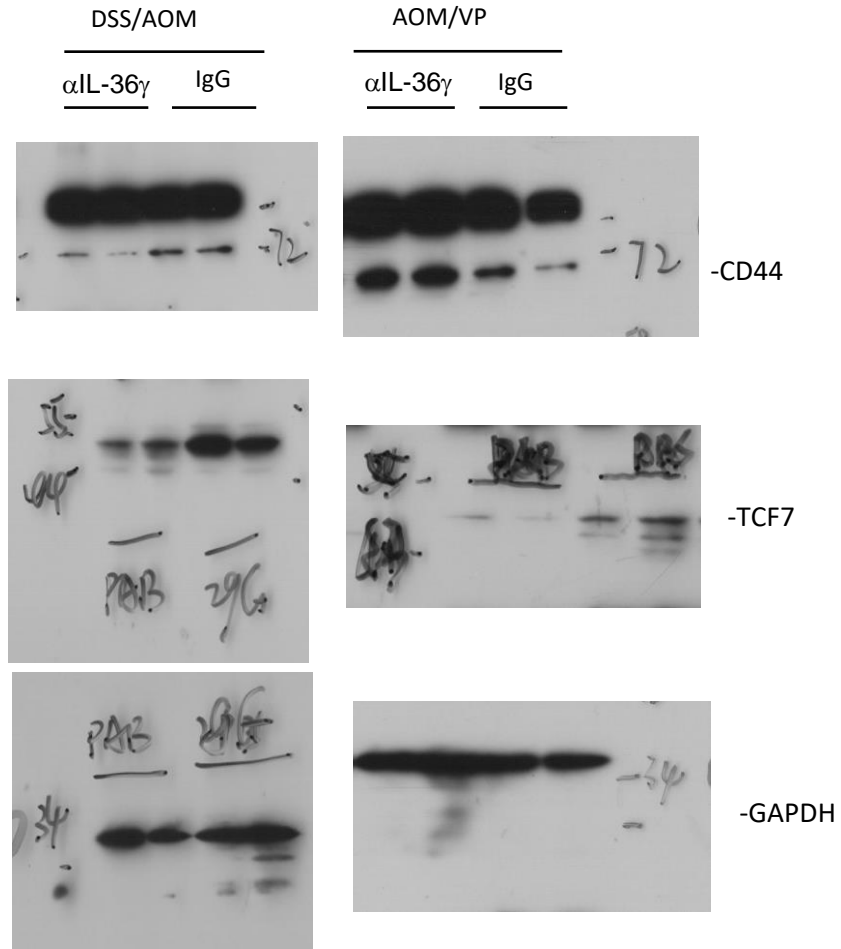

Supplement: ADVS-9-2103035-s008.pdf [file ADVS-9-2103035-s008.pdf]
